# Supplementary material
Source: Springer Nature journal article supplement (https://www.springermedizin.de/resource/supplementary/12891_2008_567_MOESM1_ESM.pdf/9511352)
Supplement: MOESM1 [file 9511352]

# SPADI

## Shoulder Pain and Disability Index

Norsk versjon

Roach KE et al. **Development of a shoulder pain and disability index.** *Arthritis Care and Research* 1991, 4(4):143-149.

## Spørreskjema om vond skulder

Del I: Sett et merke på linjen for å vise hvor sterke SMERTER du har hatt **den siste uken** for hvert spørsmål

Eksempel:

Ingen  
smerter

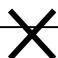

Verst tenkelige  
smerter

1. På det  
verste?

Ingen  
smerter

Verst tenkelige  
smerter

2. Når du lå på den vonde  
siden?

Ingen  
smerter

Verst tenkelige  
smerter

3. Når du strakte deg etter noe på en høy  
hulle?

Ingen  
smerter

Verst tenkelige  
smerter

4. Når du tok på  
nakken?

Ingen  
smerter

Verst tenkelige  
smerter

5. Når du skjøv med den vonde  
armen?

Ingen  
smerter

Verst tenkelige  
smerter

Del II: Sett ett merke på linjen for å vise hvor store VANSKER du har hatt **den siste uken** når du utførte aktivitetene som er opplistet nedenfor

1. Når du vasket håret?

Ingen  
vansker

---

Så vanskelig at jeg måtte ha hjelp

2. Når du vasket deg på ryggen?

Ingen  
vansker

---

Så vanskelig at jeg måtte ha hjelp

3. Når du tok på deg undertrøye eller genser?

Ingen  
vansker

---

Så vanskelig at jeg måtte ha hjelp

4. Når du tok på deg en skjorte med knepping foran?

Ingen  
vansker

---

Så vanskelig at jeg måtte ha hjelp

5. Når du tok på deg buksene?

Ingen  
vansker

---

Så vanskelig at jeg måtte ha hjelp

6. Når du plasserte en gjenstand på en høy hylle?

Ingen  
vansker

---

Så vanskelig at jeg måtte ha hjelp

7. Når du bar en tung gjenstand på 5 kg eller mer?

Ingen  
vansker

---

Så vanskelig at jeg måtte ha hjelp

8. Når du tok opp noe fra baklomma?

Ingen  
vansker

---

Så vanskelig at jeg måtte ha hjelp
